# Supplementary material for: Designable synthesis of reactive deep eutectic solvents (RDESs) in regulating Ni-based materials for an efficient oxygen evolution reaction
Source: Royal Society of Chemistry journal article supplement (doi:10.1039/d2gc02958h), 2022-01-01
Supplement: d2gc02958h1.pdf [file d2gc02958h1.pdf]

## Supporting Information

### **Designable synthesis of reactive deep eutectic solvents (RDESs) in regulating Ni-based materials for efficient oxygen evolution reaction**

Yahui Wei,<sup>a‡</sup> Jingyun Jiang,<sup>a‡</sup> Jialong Dong,<sup>a</sup> Yifan Xu,<sup>a</sup> Jianwei Fu,<sup>\*a</sup> and Qun Xu<sup>\*ab</sup>

<sup>a</sup>College of Materials Science and Engineering, Zhengzhou University, Zhengzhou 450001,  
P. R. China.

<sup>b</sup>Henan Institute of Advanced Technology, Zhengzhou University, Zhengzhou 450001,  
P. R. China.

E-mail: [jwfu@zzu.edu.cn](mailto:jwfu@zzu.edu.cn); [qunxu@zzu.edu.cn](mailto:qunxu@zzu.edu.cn)

‡The authors contributed equally to this work.

# Tables of contents

## 1. Supplementary Figures and Tables

**Figure S1** Structure of the selected eight amine acids.

**Figure S2** Photograph of the synthesized RDEs.

**Figure S3** TGA curves of the Thr-NiCl<sub>2</sub>·6H<sub>2</sub>O at the molar ratio of 1:4 (above) and 1:2 (below).

**Figure S4** XRD pattern, of Ni/Ni(OH)<sub>2</sub> nanosheets (a) and Ni nanoparticles (b) grown on the CPs.

**Figure S5** XRD pattern of the samples derived from serine-NiCl<sub>2</sub>·6H<sub>2</sub>O system (a) and threonine-NiCl<sub>2</sub>·6H<sub>2</sub>O (b) at different times.

**Figure S6** (a) TEM and (b) HRTEM images of the obtained Ni nanoparticles.

**Figure S7** The XPS survey spectrum of the Ni (below) and Ni/Ni(OH)<sub>2</sub> (above) samples.

**Figure S8** LSV curves for bare carbon papers with 90% iR correction at a sweep rate of 5 mV s<sup>-1</sup>.

**Figure S9.** Cyclic voltammograms of (a) Ni/Ni(OH)<sub>2</sub> and (b) Ni nanoparticles at scan rates from 10 to 75 mV s<sup>-1</sup>.

**Figure S10** LSV curves of 2D Ni/Ni(OH)<sub>2</sub> (red) and Ni nanoparticles (blue) after normalized with C<sub>dl</sub>.

**Figure S11** Nyquist plots and the related fitting curves of Ni (red) and Ni/Ni(OH)<sub>2</sub> (blue).

**Figure S12** Multi-current step curves of 2D Ni/Ni(OH)<sub>2</sub>.

**Figure S13** Chronoamperometric curve of Ni nanoparticles at 1.6 V (vs RHE) for 15 h.

**Figure S14** TEM(a) and HRTEM(b) images of Ni/Ni(OH)<sub>2</sub> nanosheets after long-term OER test.

**Figure S15** XPS spectra of the 2D Ni/Ni(OH)<sub>2</sub> samples initial (above) and along-term OER test (below) : (a) the full spectra, (b) Ni 2p and (c) O 1s.

**Table S1** Assignments of the FTIR of Ser-NiCl<sub>2</sub>·6H<sub>2</sub>O and the related serine.

**Table S2** Assignments of the FTIR of Thr-NiCl<sub>2</sub>·6H<sub>2</sub>O and the related threonine.

**Table S3** Assignments of the FTIR of Glu-NiCl<sub>2</sub>·6H<sub>2</sub>O and the related glutamic acid.

**Table S4** Assignments of the FTIR of Gln-NiCl<sub>2</sub>·6H<sub>2</sub>O and the related glutamine.

**Table S5** Assignments of the FTIR of Pro-NiCl<sub>2</sub>·6H<sub>2</sub>O and the related proline.

**Table S6** Assignments of the FTIR of His-NiCl<sub>2</sub>·6H<sub>2</sub>O and the related histidine.

**Table S7** Assignments of the FTIR of Lys-NiCl<sub>2</sub>·6H<sub>2</sub>O and the related lysine.

**Table S8** Assignments of the FTIR of Arg-NiCl<sub>2</sub>·6H<sub>2</sub>O and the related arginine.

**Table S9** The reactive decomposition temperatures ( $T_{\text{reactive}}$ ) and onset temperatures ( $T_{\text{onset}}$ ) of the synthesized RDESSs.

**Table S10** The OER performance of 2D Ni/Ni(OH)<sub>2</sub> in similar alkaline media and other representative reported non-precious metal electrocatalysts.

## 2. Reference

## 1. Supplementary Figures and Tables

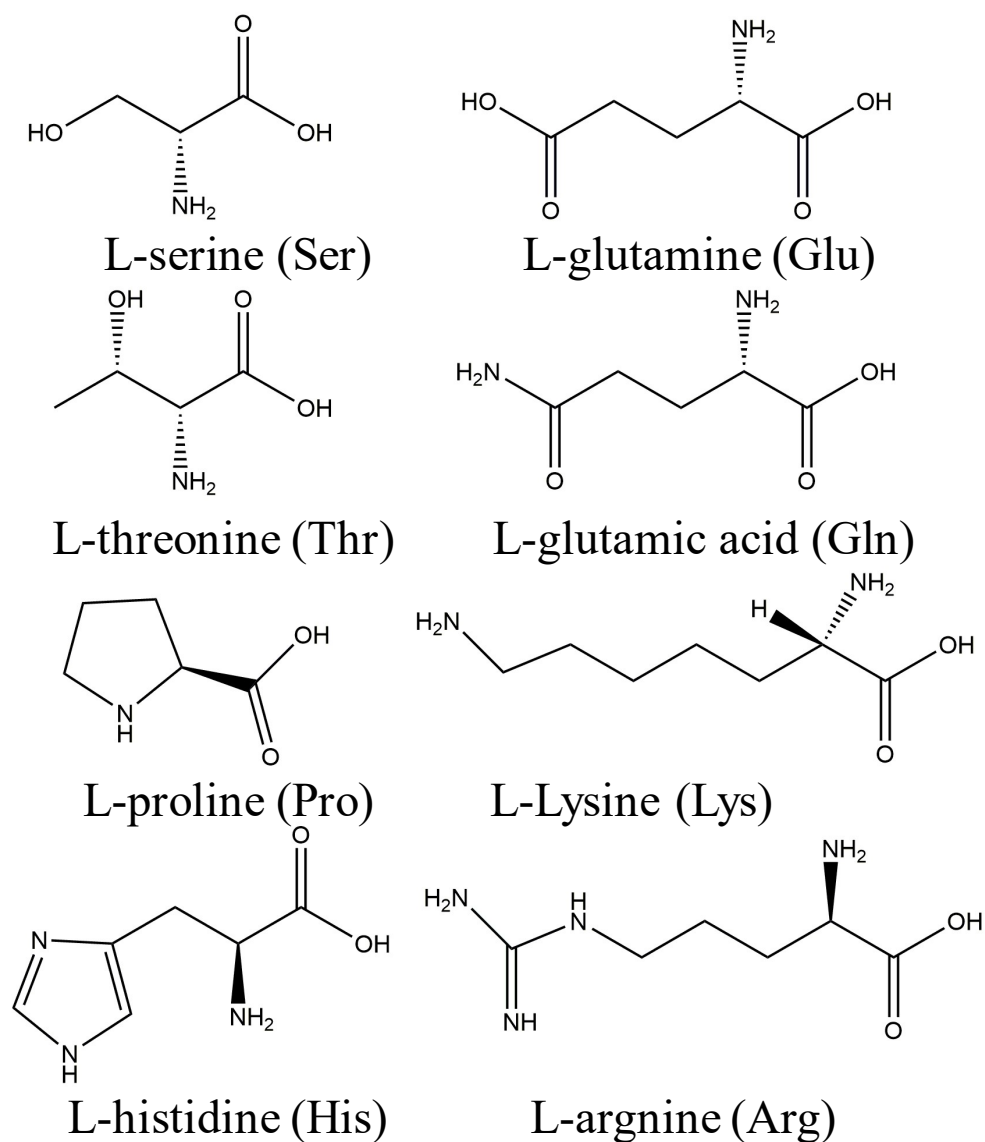

Figure S1 Structure of the selected eight amine acids.

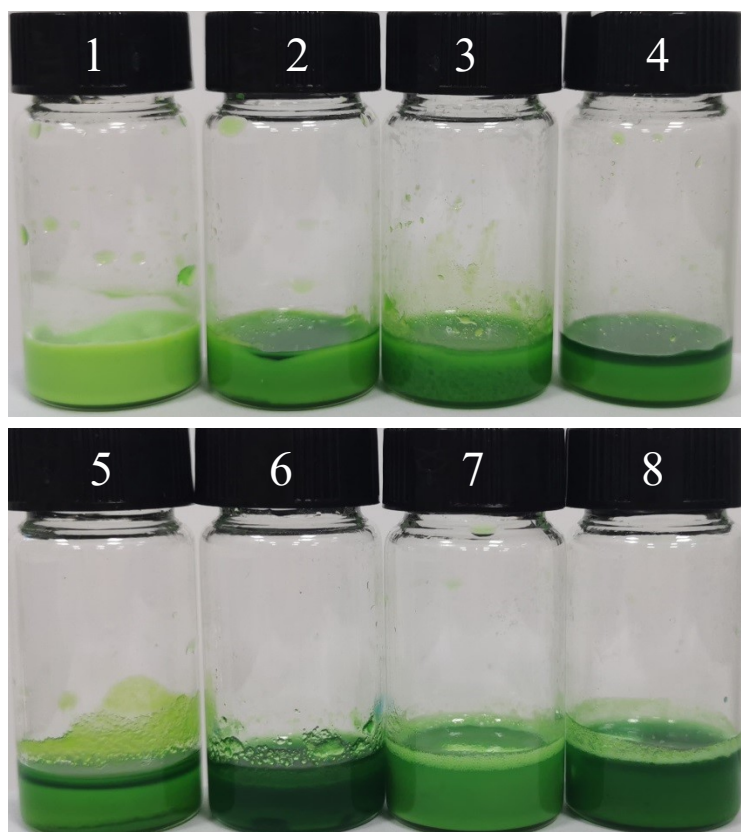

**Figure S2 Photograph of the synthesized RDESSs:** 1 Ser- $\text{NiCl}_2 \cdot 6\text{H}_2\text{O}$ , 2 Thr- $\text{NiCl}_2 \cdot 6\text{H}_2\text{O}$ , 3 Glu- $\text{NiCl}_2 \cdot 6\text{H}_2\text{O}$ , 4 Gln- $\text{NiCl}_2 \cdot 6\text{H}_2\text{O}$ , 5 Pro- $\text{NiCl}_2 \cdot 6\text{H}_2\text{O}$ , 6 His- $\text{NiCl}_2 \cdot 6\text{H}_2\text{O}$ , 7 Lys- $\text{NiCl}_2 \cdot 6\text{H}_2\text{O}$ , 8 Arg- $\text{NiCl}_2 \cdot 6\text{H}_2\text{O}$ .

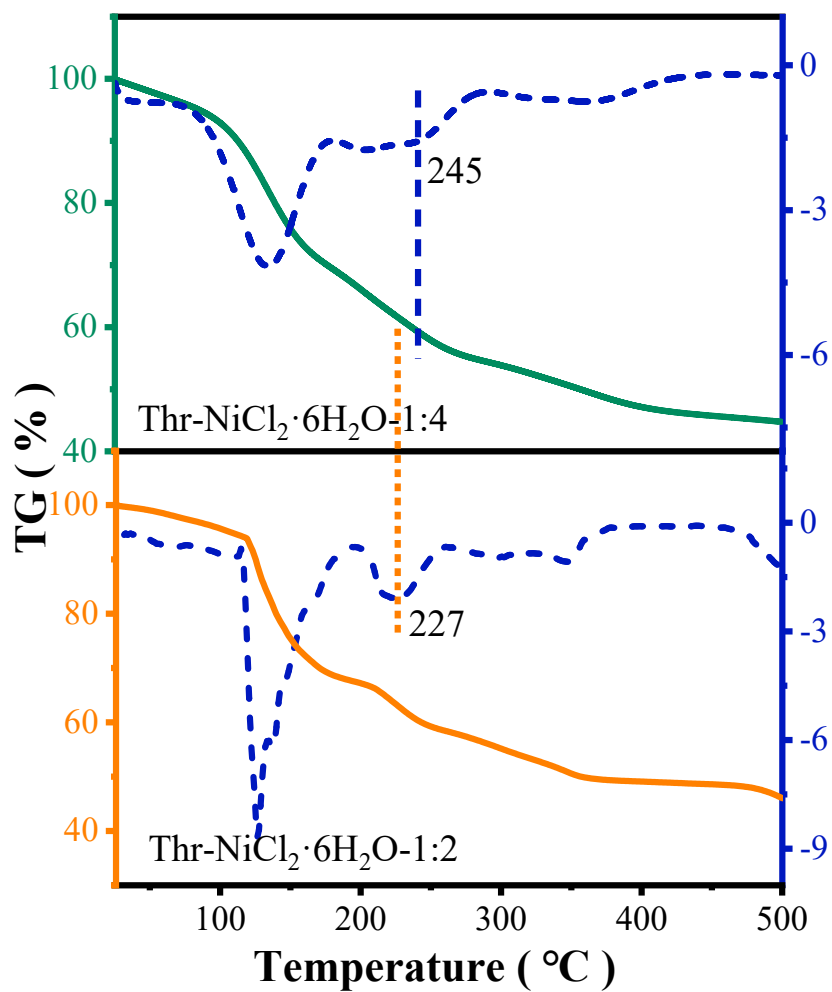

Figure S3 TGA curves of the Thr-NiCl<sub>2</sub>·6H<sub>2</sub>O at the molar ratio of 1:4 (above) and 1:2 (below).

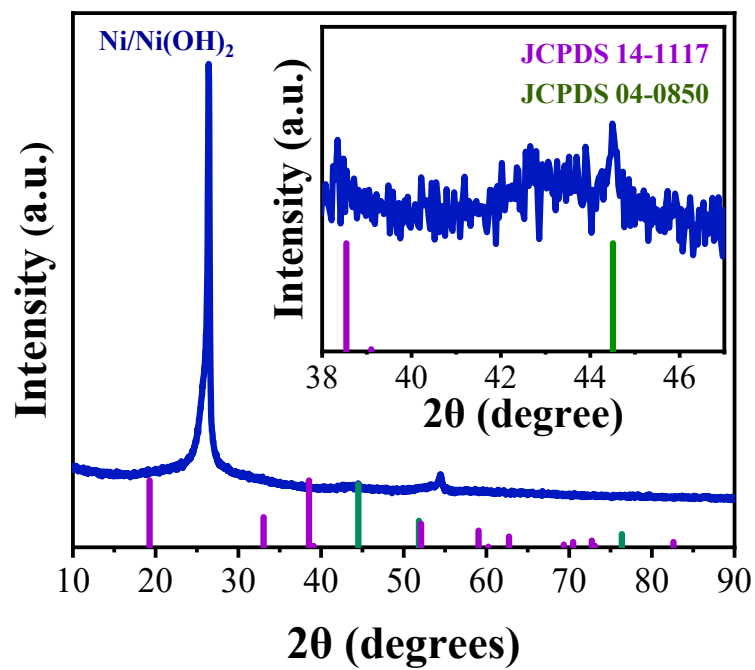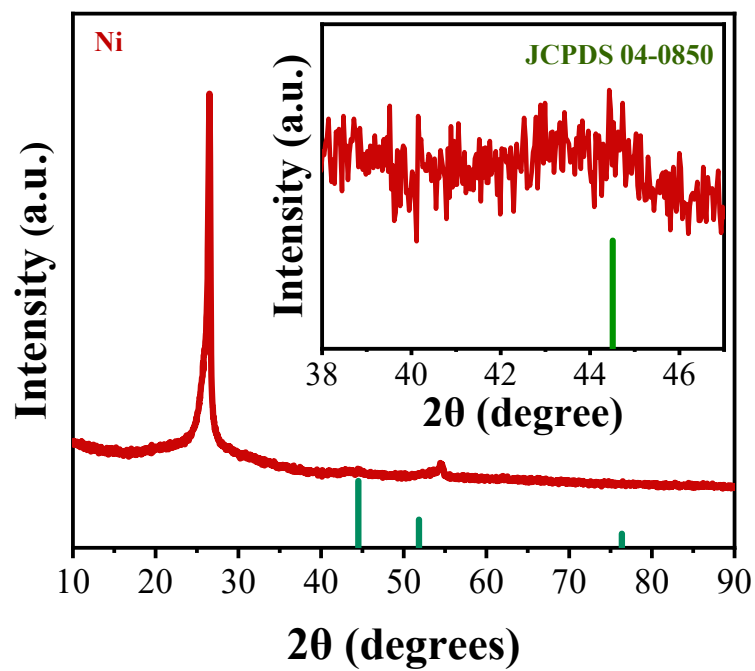

Figure S4 XRD pattern of Ni/Ni(OH)<sub>2</sub> nanosheets (a) and Ni nanoparticles (b) grown on the CPs.

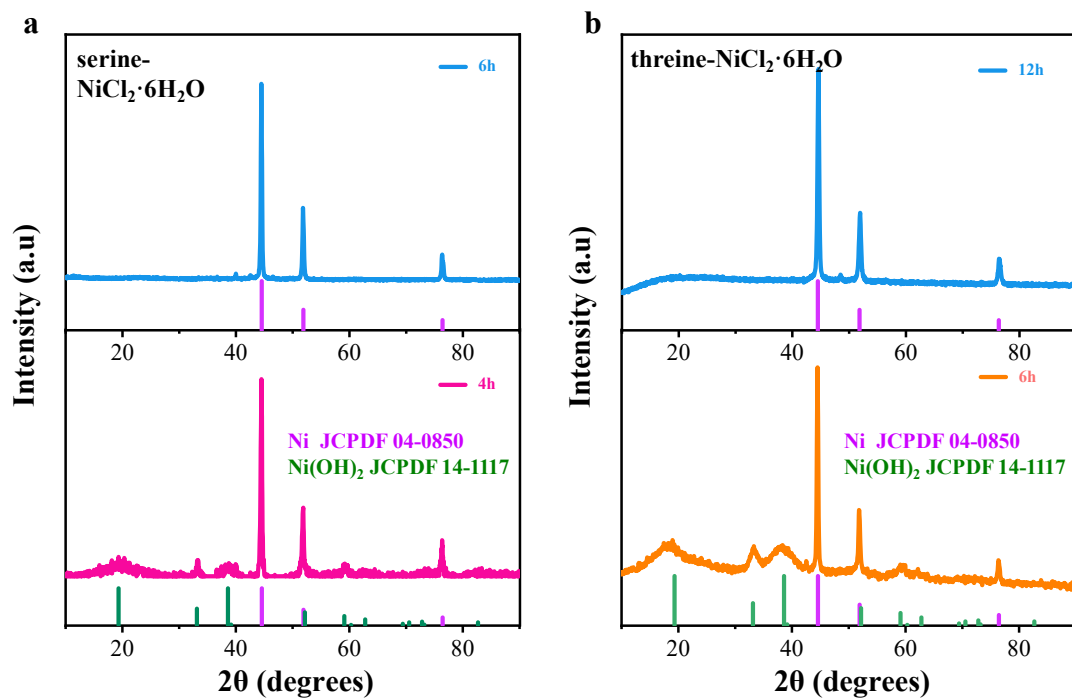

Figure S5 XRD pattern of the samples derived from serine- $\text{NiCl}_2 \cdot 6\text{H}_2\text{O}$  system (a) and threonine- $\text{NiCl}_2 \cdot 6\text{H}_2\text{O}$  (b) at different times.



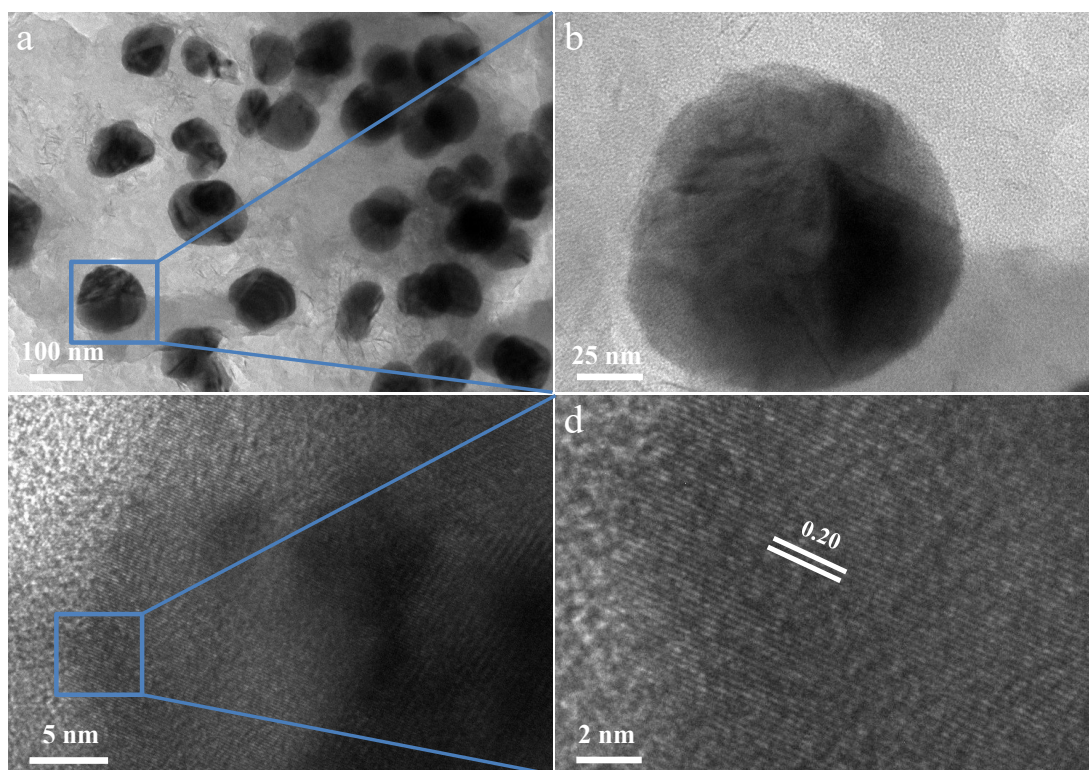

**Figure S6 (a) TEM and (b) HRTEM images of the obtained Ni nanoparticles.**

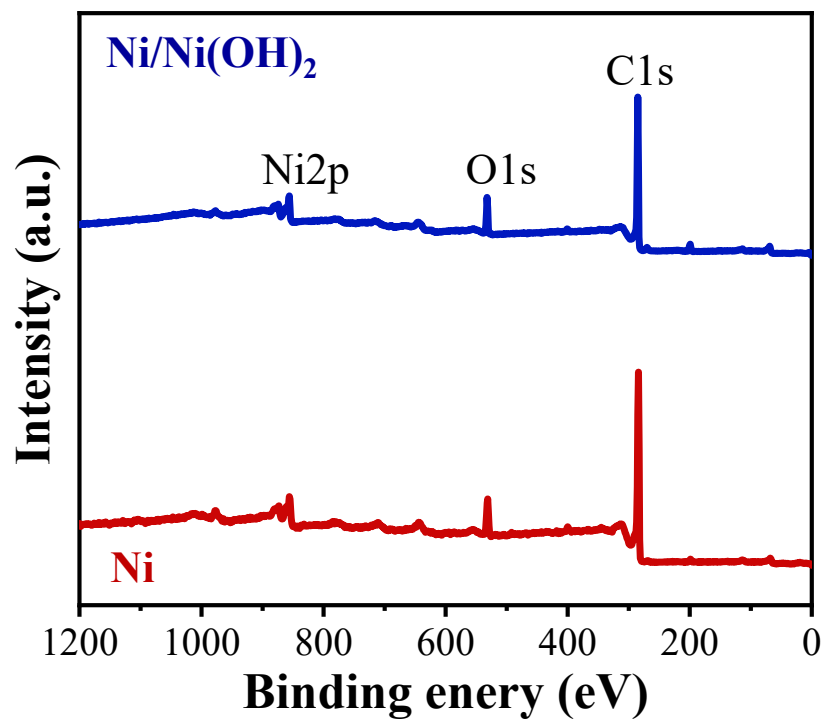

Figure S7 The XPS survey spectrum of the Ni (below) and Ni/Ni(OH)<sub>2</sub> (above) samples.

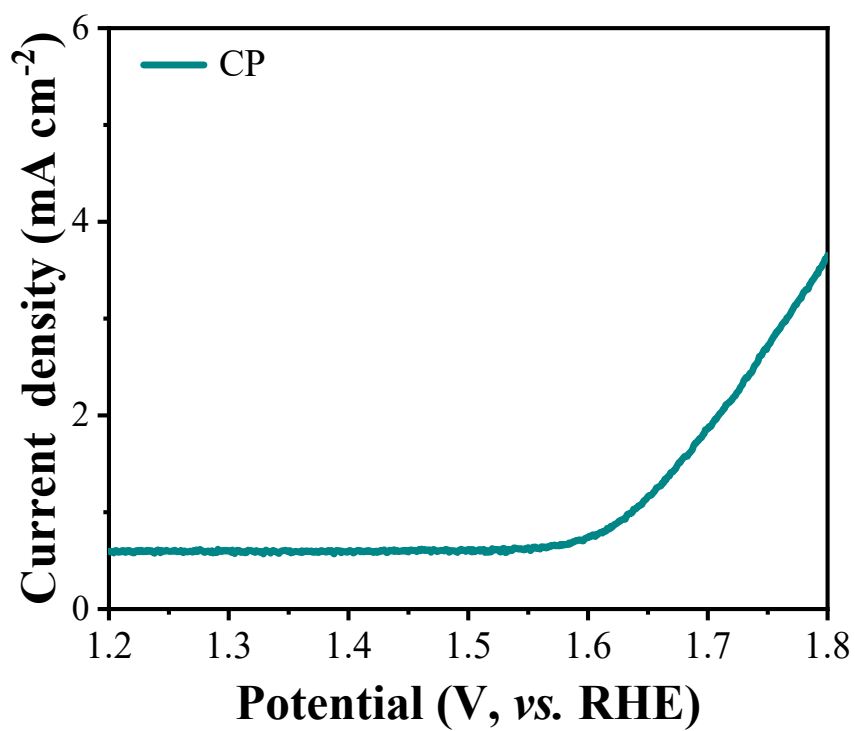

**Figure S8** LSV curves for bare carbon papers with 90% iR correction at a sweep rate of 5 mV s<sup>-1</sup>.

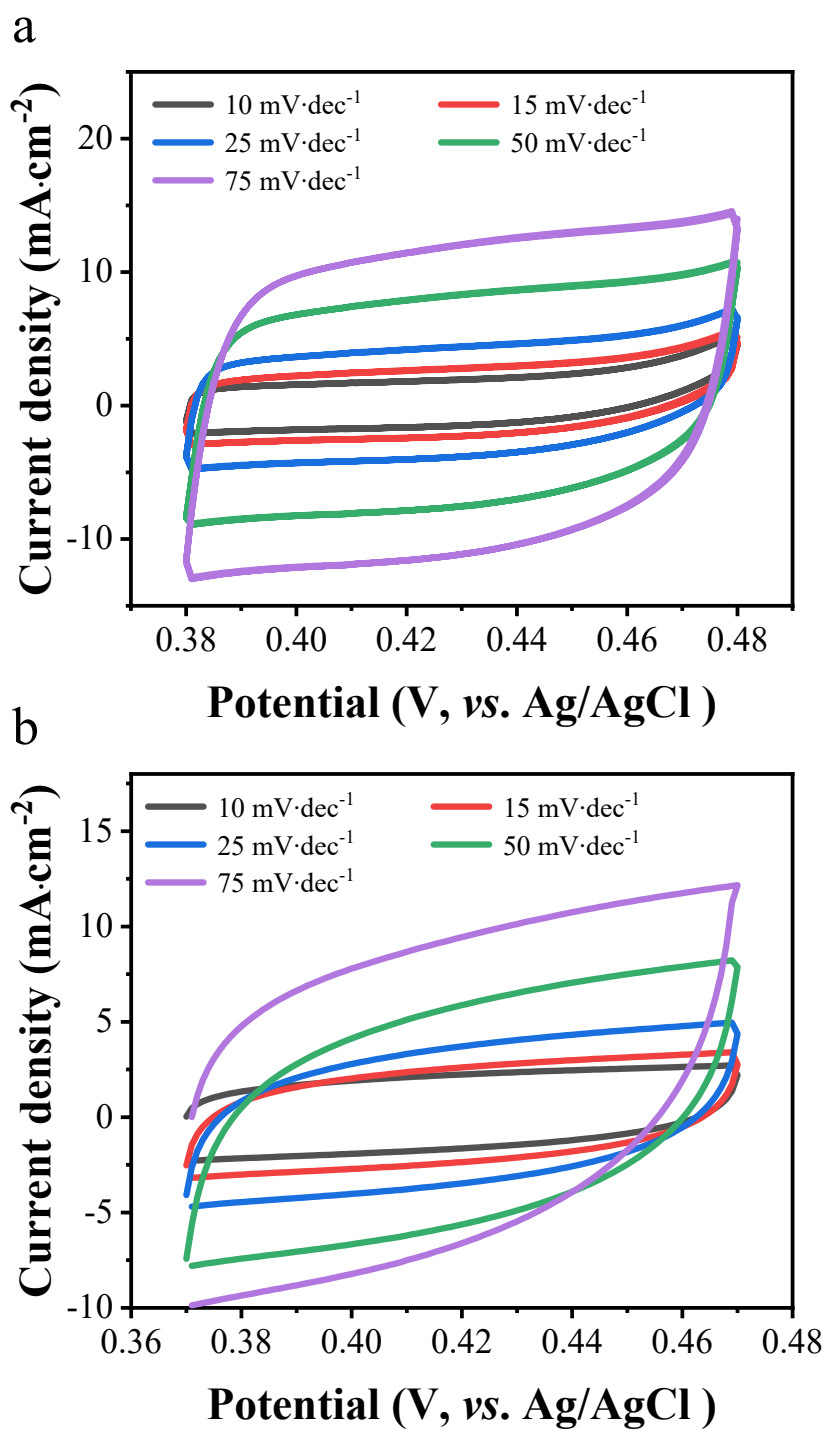

Figure S9 Cyclic voltammograms of (a) Ni/Ni(OH)<sub>2</sub> and (b) Ni nanoparticles at scan rates from 10 to 75  $\text{mV s}^{-1}$ .

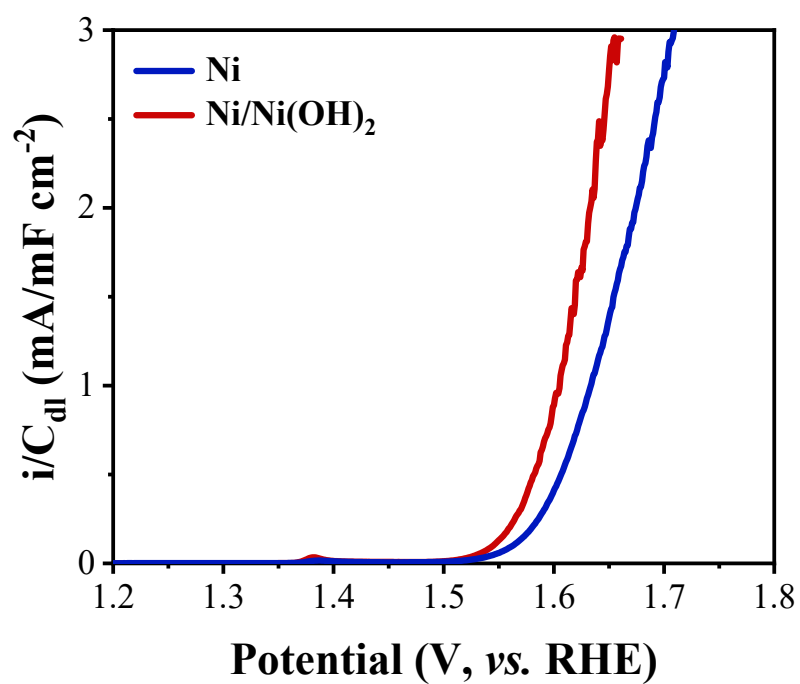

**Figure S10** LSV curves of 2D Ni/Ni(OH)<sub>2</sub> (red) and Ni nanoparticles (blue) after normalized with  $C_{dl}$ .

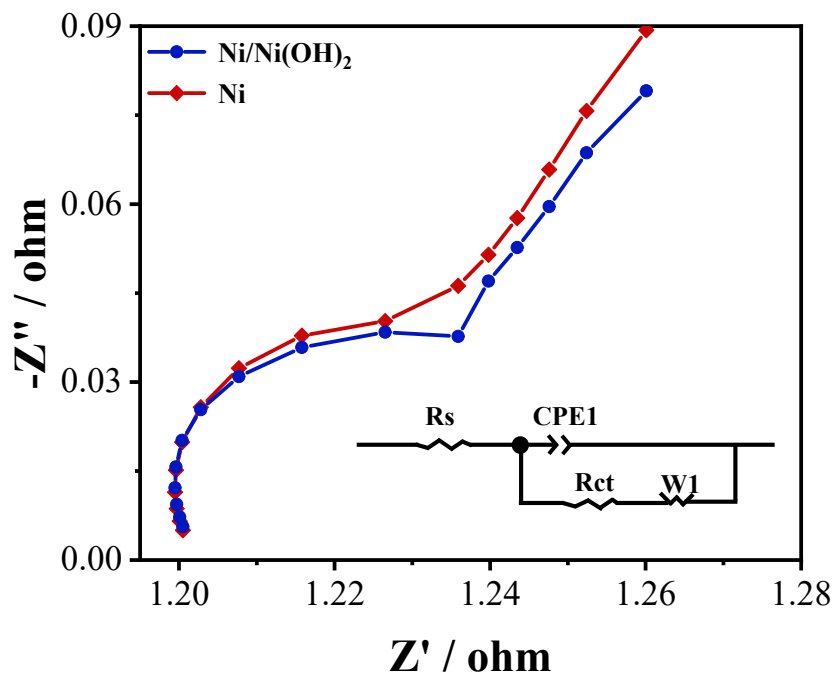

Figure S11 Nyquist plots and the related fitting curves of Ni (red) and Ni/Ni(OH)<sub>2</sub> (blue).

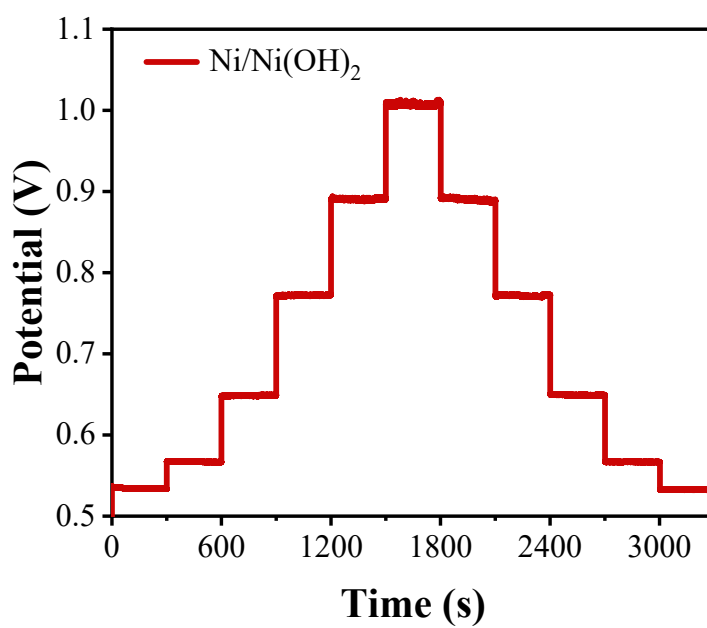

**Figure S12 Multi-current step curves of 2D Ni/Ni(OH)<sub>2</sub>.**

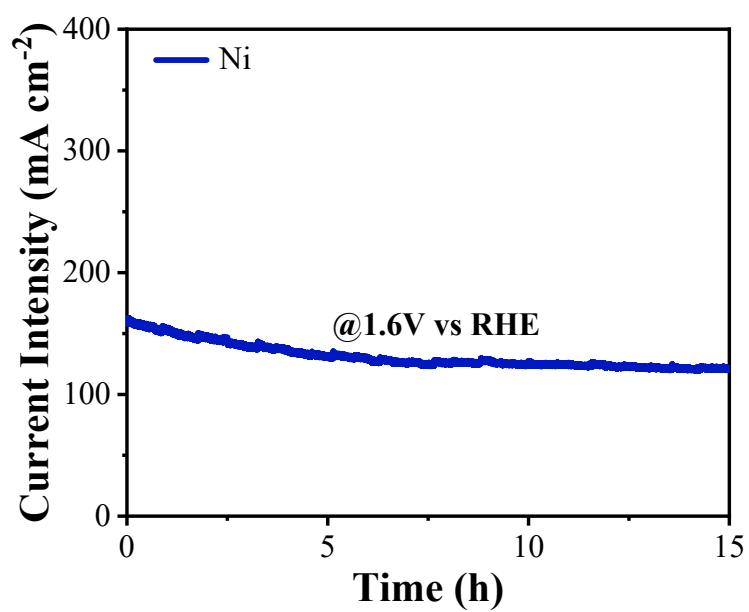

**Figure S13** Chronoamperometric curve of Ni nanoparticles at 1.6 V (vs RHE) for 15 h.



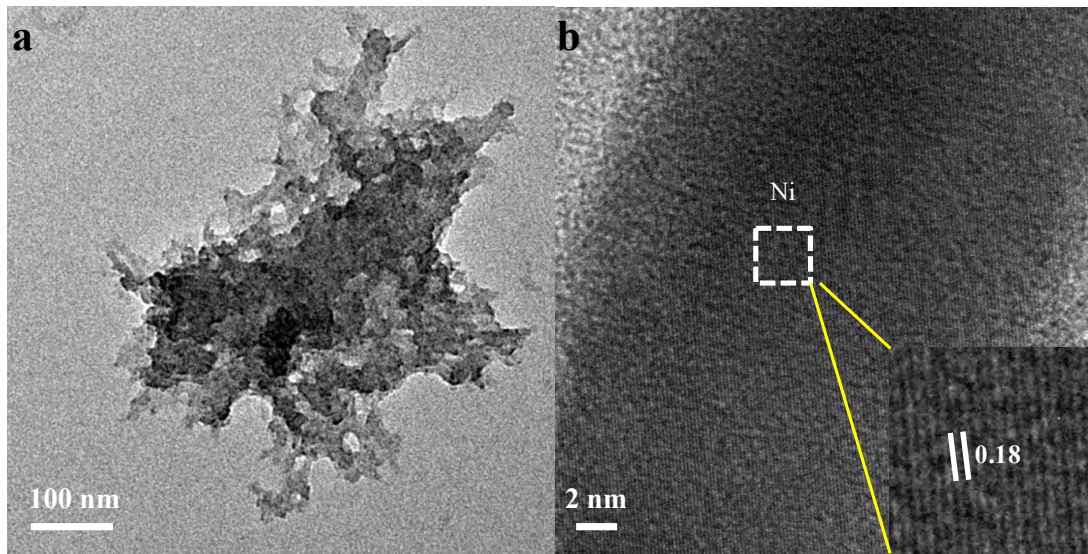

**Figure S14** TEM(a) and HRTEM(b) images of Ni/Ni(OH)<sub>2</sub> nanosheets after long-term OER test.

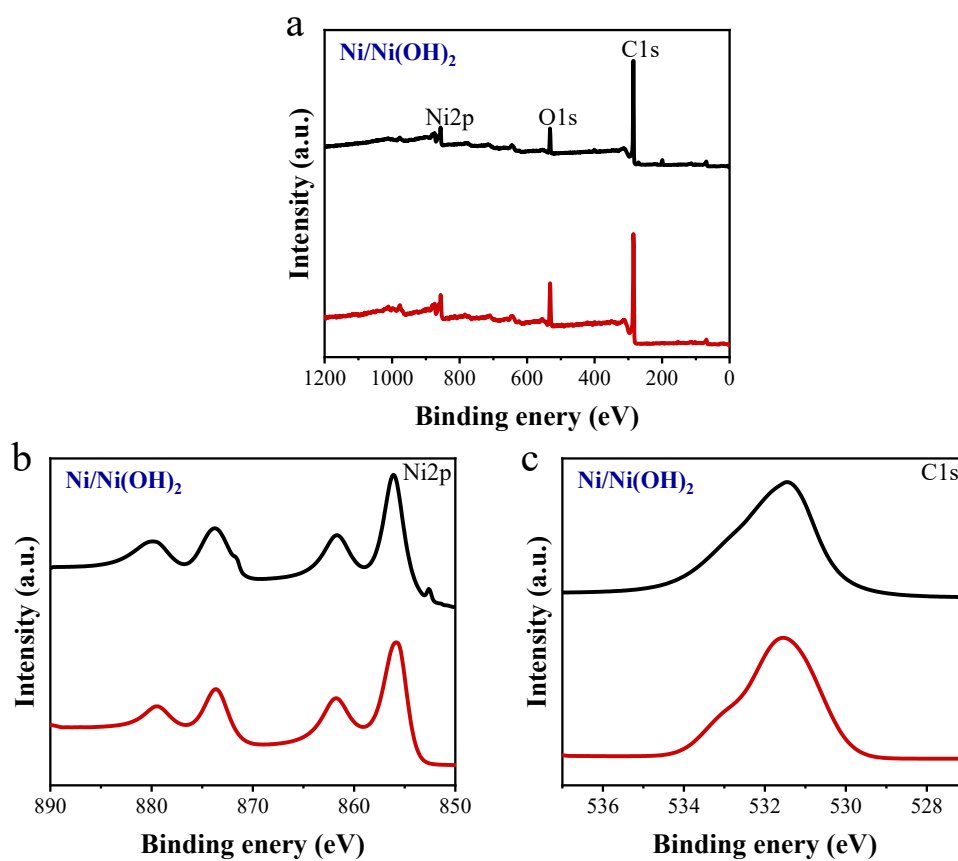

**Figure S15 XPS spectra of the 2D Ni/Ni(OH)<sub>2</sub> samples initial (above) and a long-term OER test (below) : (a) the full spectra, (b) Ni 2p and (c) O 1s.**

**Table S1 Assignments of the FTIR of Ser-NiCl<sub>2</sub>·6H<sub>2</sub>O and the related serine.<sup>1</sup>**

| Groups                       | Vibration         | Absorption band of serine, cm <sup>-1</sup> | Absorption band of Ser-NiCl <sub>2</sub> ·6H <sub>2</sub> O, cm <sup>-1</sup> |
|------------------------------|-------------------|---------------------------------------------|-------------------------------------------------------------------------------|
| NH <sub>3</sub> <sup>+</sup> | τ                 | 531                                         | 500-700 with max at 650                                                       |
| COO <sup>-</sup>             | δ                 | 613                                         |                                                                               |
| C-N                          | ν                 | 1014                                        | 1045                                                                          |
| COO <sup>-</sup>             | ν <sub>symm</sub> | 1411                                        | 1434                                                                          |
|                              | ν <sub>as</sub>   | 1600                                        | 1628                                                                          |
| NH <sub>3</sub> <sup>+</sup> | ν <sub>symm</sub> | 2040                                        | no                                                                            |
| NH <sub>3</sub> <sup>+</sup> | ν                 | 2500-3350                                   | 2500-3500 with max at 3344                                                    |
| O-H                          | ν                 | 3465                                        |                                                                               |

ν, bond stretching; δ, in-plane bending; γ, out-of-plane bending; ω, wagging; τ, twisting; as, asymmetric; s, symmetric

**Table S2 Assignments of the FTIR of Thr-NiCl<sub>2</sub>·6H<sub>2</sub>O and the related threonine.<sup>2</sup>**

| Groups                       | Vibration         | Absorption band of threonine, cm <sup>-1</sup> | Absorption band of Thr-NiCl <sub>2</sub> ·6H <sub>2</sub> O, cm <sup>-1</sup> |
|------------------------------|-------------------|------------------------------------------------|-------------------------------------------------------------------------------|
| NH <sub>3</sub> <sup>+</sup> | τ                 | 531                                            |                                                                               |
| COO <sup>-</sup>             | γ                 | 563                                            | 500-700 with max at 659                                                       |
|                              | ω                 | 701                                            |                                                                               |
| C-N                          | ν                 | 1041                                           | 1041                                                                          |
| NH <sub>3</sub> <sup>+</sup> | γ                 | 1112                                           | 1077                                                                          |
| COO <sup>-</sup>             | ν <sub>symm</sub> | 1417                                           | 1435                                                                          |
| COO <sup>-</sup>             | ν <sub>as</sub>   | 1628                                           | 1628                                                                          |
| NH <sub>3</sub> <sup>+</sup> | ν <sub>symm</sub> | 2050                                           | no                                                                            |
| N-H, O-H,C-H                 | ν                 | 2100-3400 with max at                          | 2500-3700 with max at                                                         |
|                              |                   | 2975                                           | 3344                                                                          |

ν, bond stretching; δ, in-plane bending; γ, out-of-plane bending; ω, wagging; τ, twisting; as, asymmetric; s, symmetric

**Table S3 Assignments of the FTIR of Glu-NiCl<sub>2</sub>·6H<sub>2</sub>O and the related glutamic acid<sup>3,4</sup>**

| <b>Groups</b>                | <b>Vibration</b>  | <b>Absorption band of glutamic acid, cm<sup>-1</sup></b> | <b>Absorption band of Glu-NiCl<sub>2</sub>·6H<sub>2</sub>O, cm<sup>-1</sup></b> |
|------------------------------|-------------------|----------------------------------------------------------|---------------------------------------------------------------------------------|
| C=O                          | γ                 | 540                                                      | 500-700 with max at 676                                                         |
| NH <sub>3</sub> <sup>+</sup> | v <sub>symm</sub> | 1505                                                     | 1505                                                                            |
| COO <sup>-</sup>             | v <sub>symm</sub> | 1668                                                     | 1700                                                                            |
| NH <sub>3</sub> <sup>+</sup> | v <sub>symm</sub> | 2081                                                     | no                                                                              |
| N-H, C-H                     | v                 | 2800-3300 with max at<br>3056                            | 2500-3700 with max at<br>3320                                                   |

v, bond stretching; δ, in-plane bending; γ, out-of-plane bending; ω, wagging; τ, twisting; as, asymmetric; s, symmetric

**Table S4 Assignments of the FTIR of Gln-NiCl<sub>2</sub>·6H<sub>2</sub>O and the related glutamine.<sup>5</sup>**

| Groups                       | Vibration         | Absorption band of glutamine, cm <sup>-1</sup> | Absorption band of Gin-NiCl <sub>2</sub> ·6H <sub>2</sub> O, cm <sup>-1</sup> |
|------------------------------|-------------------|------------------------------------------------|-------------------------------------------------------------------------------|
|                              | γ                 | 540                                            |                                                                               |
| C=O                          | δ                 | 622                                            | 500-700 with max at 620                                                       |
|                              | ω                 | 654                                            |                                                                               |
| NH <sub>3</sub> <sup>+</sup> | γ                 | 1131                                           | 1147                                                                          |
|                              | δ                 | 1489                                           | 1500                                                                          |
| COO <sup>-</sup>             | ν                 | 1635                                           | 1654                                                                          |
| NH <sub>3</sub> <sup>+</sup> | ν <sub>symm</sub> | 2041                                           | no                                                                            |
| C-H                          | ν                 | 2932                                           |                                                                               |
| CH <sub>2</sub>              | ν                 | 3173                                           | 2500-3700 with max at 3340                                                    |
| NH <sub>3</sub> <sup>+</sup> | ν <sub>as</sub>   | 3408                                           |                                                                               |
|                              | ν <sub>symm</sub> | 3215                                           |                                                                               |

ν, bond stretching; δ, in-plane bending; γ, out-of-plane bending; ω, wagging; τ, twisting; as, asymmetric; s, symmetric

**Table S5 Assignments of the FTIR of Pro-NiCl<sub>2</sub>·6H<sub>2</sub>O and the related proline.<sup>6</sup>**

| Groups           | Vibration       | Absorption band of proline, cm <sup>-1</sup> | Absorption band of Pro-NiCl <sub>2</sub> ·6H <sub>2</sub> O, cm <sup>-1</sup> |
|------------------|-----------------|----------------------------------------------|-------------------------------------------------------------------------------|
| CH <sub>2</sub>  | ρ               | 800,852                                      | 500-800 with max at 670                                                       |
| ring             | δ               | 642                                          |                                                                               |
| CH               | δ               | 1294                                         | 1328                                                                          |
| O-H              | δ               | 1377                                         | 1423                                                                          |
| N-H              | δ               | 1548                                         | 1560                                                                          |
| COO <sup>-</sup> | ν               | 1630                                         | 1630                                                                          |
| CH <sub>2</sub>  | ν <sub>s</sub>  | 2938,2956                                    | 2700-3700 with max at 3300                                                    |
|                  | ν <sub>as</sub> | 3012,2978                                    |                                                                               |
| N-H              | ν               | 3410                                         |                                                                               |
| O-H              | ν               | 3518                                         |                                                                               |

ν, bond stretching; δ, in-plane bending; γ, out-of-plane bending; ω, wagging; τ, twisting; as, asymmetric; s, symmetric

**Table S6 Assignments of the FTIR of His-NiCl<sub>2</sub>·6H<sub>2</sub>O and the related histidine.<sup>7</sup>**

| Groups                       | Vibration         | Absorption band of histidine, cm <sup>-1</sup> | Absorption band of His-NiCl <sub>2</sub> ·6H <sub>2</sub> O, cm <sup>-1</sup> |
|------------------------------|-------------------|------------------------------------------------|-------------------------------------------------------------------------------|
| C-H of ring                  | δ                 | 540                                            |                                                                               |
| C-H                          | δ                 | 624,686                                        | 500-800 with max at 630                                                       |
| N-H                          | γ                 | 925,964                                        |                                                                               |
| N-H                          | δ                 | 1568                                           | 1583                                                                          |
| COO <sup>-</sup>             | ν                 | 1640                                           | 1640                                                                          |
| NH <sub>3</sub> <sup>+</sup> | ν <sub>symm</sub> | 2019                                           | no                                                                            |
| CH <sub>2</sub>              | ν                 | 2615,2992                                      | 2700-3700 with max at 3300                                                    |
| C-H of ring                  | ν                 | 3109                                           |                                                                               |

ν, bond stretching; δ, in-plane bending; γ, out-of-plane bending; ω, wagging; τ, twisting; as, asymmetric; s, symmetric



**Table S7 Assignments of the FTIR of Lys-NiCl<sub>2</sub>·6H<sub>2</sub>O and the related lysine.<sup>8</sup>**

| Groups                       | Vibration         | Absorption band of lysine, cm <sup>-1</sup> | Absorption band of Lys-NiCl <sub>2</sub> ·6H <sub>2</sub> O, cm <sup>-1</sup> |
|------------------------------|-------------------|---------------------------------------------|-------------------------------------------------------------------------------|
| O-H                          | δ                 | 497                                         |                                                                               |
| COO <sup>-</sup>             | ν                 | 551                                         | 500-800 with max at 657                                                       |
|                              | ν                 | 729                                         |                                                                               |
| COO <sup>-</sup>             | ν <sub>symm</sub> | 1414                                        | 1414                                                                          |
| NH <sub>3</sub> <sup>+</sup> | ν <sub>as</sub>   | 1515                                        | 1515                                                                          |
| COO <sup>-</sup>             | ν <sub>symm</sub> | 1589                                        | 1612                                                                          |
| CH <sub>2</sub>              | ν                 | 2937                                        | 2700-3700 with max at 3300                                                    |
| NH <sub>3</sub> <sup>+</sup> | ν                 | 3361                                        |                                                                               |

ν, bond stretching; δ, in-plane bending; γ, out-of-plane bending; ω, wagging; τ, twisting; as, asymmetric; s, symmetric

**Table S8 Assignments of the FTIR of Arg-NiCl<sub>2</sub>·6H<sub>2</sub>O and the related arginine.<sup>9</sup>**

| <b>Groups</b>                | <b>Vibration</b>  | <b>Absorption band of<br/>arginine, cm<sup>-1</sup></b> | <b>Absorption band of<br/>Arg-NiCl<sub>2</sub>·6H<sub>2</sub>O, cm<sup>-1</sup></b> |
|------------------------------|-------------------|---------------------------------------------------------|-------------------------------------------------------------------------------------|
| CNH                          | v                 | 794                                                     |                                                                                     |
| O-H                          | δ                 | 1334                                                    | 1353                                                                                |
| NH <sub>3</sub> <sup>+</sup> | v <sub>as</sub>   | 1550                                                    | 1573                                                                                |
| COO <sup>-</sup>             | v <sub>as</sub>   | 1620                                                    | 1666                                                                                |
| NH <sub>3</sub> <sup>+</sup> | γ                 | 1680                                                    |                                                                                     |
| CH <sub>2</sub>              | v <sub>symm</sub> | 2928                                                    | 2700-3700 with max at<br>3300                                                       |
| NH <sub>3</sub> <sup>+</sup> | v                 | 3151                                                    |                                                                                     |

v, bond stretching; δ, in-plane bending; γ, out-of-plane bending; ω, wagging; τ, twisting; as, asymmetric; s, symmetric

**Table S9** The reactive decomposition temperatures ( $T_{\text{reactive}}$ ) and onset temperatures ( $T_{\text{onset}}$ ) of the synthesized RDESSs.

| RDESSs                                   | $T_{\text{reactive}}$ (°C) | $T_{\text{onset}}$ (°C) |
|------------------------------------------|----------------------------|-------------------------|
| Thr-NiCl <sub>2</sub> ·6H <sub>2</sub> O | 227.5                      | 126.5                   |
| Ser-NiCl <sub>2</sub> ·6H <sub>2</sub> O | 224.4                      | 124.7                   |
| Gln-NiCl <sub>2</sub> ·6H <sub>2</sub> O | 216                        | 123.8                   |
| Glu-NiCl <sub>2</sub> ·6H <sub>2</sub> O | 215                        | 122.8                   |
| His-NiCl <sub>2</sub> ·6H <sub>2</sub> O | 293                        | 121.9                   |
| Pro-NiCl <sub>2</sub> ·6H <sub>2</sub> O | 284                        | 125.5                   |
| Arg-NiCl <sub>2</sub> ·6H <sub>2</sub> O | 310                        | 122                     |
| Lys-NiCl <sub>2</sub> ·6H <sub>2</sub> O | 334.8                      | 122                     |

**Table S10 The OER performance of 2D Ni/Ni(OH)<sub>2</sub> in similar alkaline media and other representative reported non-precious metal electrocatalysts.**

| Electrocatalysts                                          | Current density<br>(mA cm <sup>-2</sup> ) | Overpotential<br>(mV) | Tafel slopes<br>(mV dec <sup>-1</sup> ) | References       |
|-----------------------------------------------------------|-------------------------------------------|-----------------------|-----------------------------------------|------------------|
| 2D Ni/Ni(OH) <sub>2</sub>                                 | <b>100</b>                                | <b>326</b>            | <b>51</b>                               | <b>This work</b> |
|                                                           | <b>1000</b>                               | <b>395</b>            |                                         |                  |
| Ni                                                        | <b>100</b>                                | <b>358</b>            | <b>62</b>                               | <b>This work</b> |
|                                                           | <b>1000</b>                               | <b>457</b>            |                                         |                  |
| Ni/Ni(OH) <sub>2</sub>                                    | 10                                        | 270                   | 70                                      | 10               |
| Co <sub>3</sub> O <sub>4</sub> -Mo <sub>2</sub> N NFs     | 41.9                                      | 300                   | 87.8                                    | 11               |
| Ni-BDC/Ni(OH) <sub>2</sub>                                | 10                                        | 320                   | 41                                      | 12               |
| Ni/Ni(OH) <sub>2</sub>                                    | 10                                        | 310                   | 74.8                                    | 13               |
| NiFe-LDH@NiCu                                             | 20                                        | 300                   | 56.9                                    | 14               |
| NrN@Ni                                                    | 10                                        | 313                   | 46                                      | 15               |
| <i>d</i> -NiFe-LDH                                        | 10                                        | 230                   | 77                                      | 16               |
|                                                           | 50                                        | 290                   |                                         |                  |
| NM50-Ni <sub>3</sub> S <sub>4</sub>                       | 10                                        | 307                   | 67                                      | 17               |
| Ni-N-O                                                    | 10                                        | 300                   | 74                                      | 18               |
| Co(s)-Fe(s)                                               | 10                                        | 355                   | 62                                      | 19               |
| Ni(CN) <sub>2</sub> /NiSe <sub>2</sub>                    | 100                                       | 470                   | 68                                      | 20               |
| Fe-NiO/NiS <sub>2</sub>                                   | 10                                        | 270                   | 40                                      | 21               |
| NiS <sub>1.03</sub> -NSC                                  | 10                                        | 270                   | 68.9                                    | 22               |
| NiCo <sub>2</sub> S <sub>4</sub>                          | 10                                        | 337                   | 64                                      | 23               |
| 2D [Co(NH <sub>3</sub> ) <sub>4</sub> CO <sub>3</sub> ]Cl | 10                                        | 291                   | 64                                      | 24               |
| OV-Fe-DES                                                 | 100                                       | 298                   | 49                                      | 25               |
| NiFe <sub>0.05</sub> -N-CP                                | 100                                       | 320                   | 76                                      | 26               |

## 2. Reference

1. S. Jarmelo, I. Reva, P. Carey and R. Fausto, *Vib. Spectrosc.*, 2007, **43**, 395-404.
2. G. R. Kumar, S. G. Raj, R. Mohan and R. Jayavel, *J. Cryst. Growth*, 2005, **275**, e1947-e1951.
3. E. Greiner, K. Kumar, M. Sumit, A. Giuffre, W. Zhao, J. Pedersen and N. Sahai, *Geochim. Cosmochim. Acta*, 2014, **133**, 142-155.
4. J. Schöll, L. Vicum, M. Müller and M. Mazzotti, *Chem. Eng. Technol.*, 2006, **29**, 257-264.
5. A. Pawlukojć, K. Hołderna-Natkaniec, G. Bator and I. Natkaniec, *Chem. Phys*, 2014, **443**, 17-25.
6. Y. S. Mary, L. Ushakumari, B. Harikumar, H. T. Varghese and C. Y. Panicker, *J. Iran. Chem. Soc.*, 2009, **6**, 138-144.
7. A. Petrosyan, *Vib. Spectrosc.*, 2007, **43**, 284-289.
8. M. B. Mary, M. Umadevi and V. Ramakrishnan, *Spectrochim. Acta, Part A*, 2005, **61**, 3124-3130.
9. S. Kumar and S. Rai, 2010.
10. L. Dai, Z. N. Chen, L. Li, P. Yin, Z. Liu and H. Zhang, *Adv. Mater.*, 2020, **32**, 1906915.
11. T. Wang, P. Wang, W. Zang, X. Li, D. Chen, Z. Kou, S. Mu and J. Wang, *Adv. Funct. Mater.*, 2022, **32**, 2107382.
12. D. Zhu, J. Liu, L. Wang, Y. Du, Y. Zheng, K. Davey and S.-Z. Qiao, *Nanoscale*, 2019, **11**, 3599-3605.
13. D. Lim, S. Kim, N. Kim, E. Oh, S. E. Shim and S.-H. Baeck, *ACS Sustainable Chem. Eng*, 2020, **8**, 4431-4439.
14. Y. Zhou, Z. Wang, Z. Pan, L. Liu, J. Xi, X. Luo and Y. Shen, *Adv. Mater.*, 2019, **31**, 1806769.
15. D. Shao, P. Li, D. Wang, C. Zhao and C. Zhao, *J. Solid State Electrochem.*, 2019, **23**, 2051-2060.
16. Y. j. Wu, J. Yang, T. x. Tu, W. q. Li, P. f. Zhang, Y. Zhou, J. f. Li, J. t. Li and S. G. Sun, *Angew. Chem., Int. Ed.*, 2021, **60**, 26829-26836.
17. K. Wan, J. Luo, C. Zhou, T. Zhang, J. Arbiol, X. Lu, B. W. Mao, X. Zhang and J. Fransaer, *Adv. Funct. Mater.*, 2019, **29**, 1900315.
18. J. Huang, Y. Sun, X. Du, Y. Zhang, C. Wu, C. Yan, Y. Yan, G. Zou, W. Wu and R. Lu, *Adv. Mater.*, 2018, **30**, 1803367.
19. C. Maccato, L. Bigiani, L. Girardi, A. Gasparotto, O. I. Lebedev, E. Modin, D. Barreca and G. A. Rizzi, *Adv. Mater. Interfaces*, 2021, **8**, 2100763.
20. J. Nai, X. Xu, Q. Xie, G. Lu, Y. Wang, D. Luan, X. Tao and X. W. Lou, *Adv. Mater.*, 2022, **34**, 2104405.
21. N. Zhang, Y. Hu, L. An, Q. Li, J. Yin, J. Li, R. Yang, M. Lu, S. Zhang, P. Xi and C.-H. Yan, *Angew. Chem., Int. Ed.*, 2022, **134**, 202207217.
22. H. Yang, C. Wang, Y. Zhang and Q. Wang, *Small*, 2018, **14**, 1703273.
23. J. Jiang, C. Yan, X. Zhao, H. Luo, Z. Xue and T. Mu, *Green Chem.*, 2017, **19**, 3023-3031.
24. S. Liu, C. Zhang, B. Zhang, Z. Li and J. Hao, *ACS Sustainable Chem. Eng*, 2019, **7**, 8964-8971.
25. S. Liu, T. Chen, H. Ying, Z. Li and J. Hao, *Adv. Sustainable Syst.*, 2020, **4**, 2000038.
26. Y. Xu, Z. Cheng, J. Jiang, J. Du and Q. Xu, *Chem. Commun.*, 2021, **57**, 13170-13173.
